# Supplementary figures and images for: Antennal Transcriptome Analysis and Identification of Candidate Chemosensory Genes of the Harlequin Ladybird Beetle, Harmonia axyridis (Pallas) (Coleoptera: Coccinellidae)
Source: MDPI journal article supplement (doi:10.3390/insects12030209), 2021-03-02

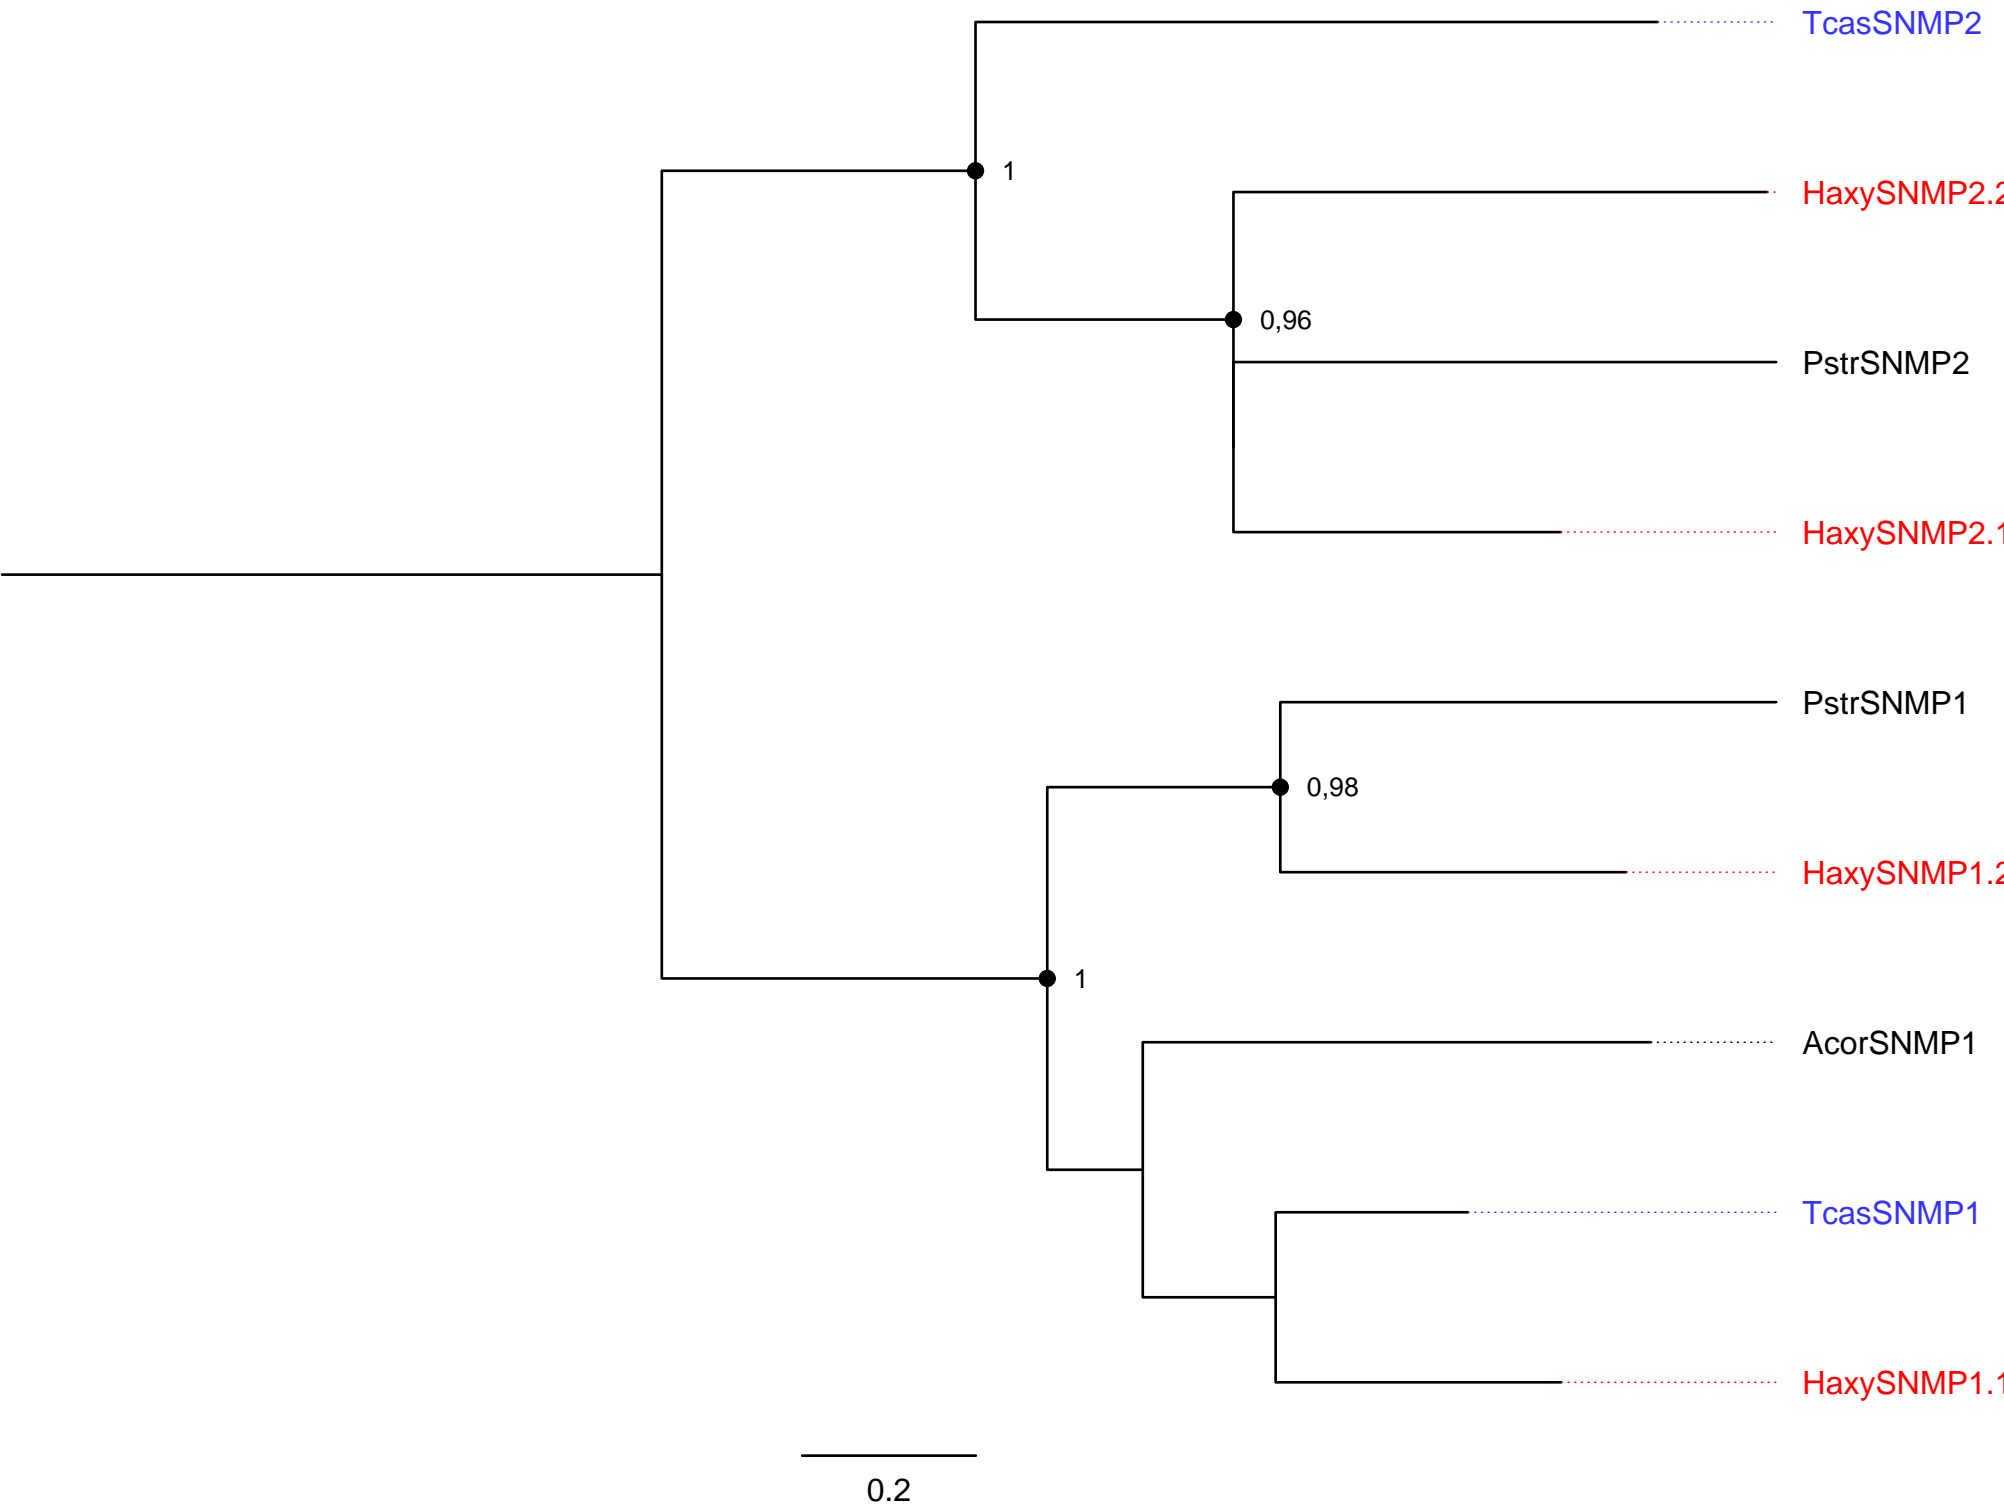

Supplement: s1 [file s1]
